# Supplementary material for: Proton-coupled pseudocapacitive behavior of a manganese oxide-decorated nitrogen-rich COP for sustainable high-performance energy storage devices
Source: Royal Society of Chemistry journal article supplement (doi:10.1039/d5ra04868k), 2025-01-01
Supplement: d5ra04868k1.pdf [file d5ra04868k1.pdf]

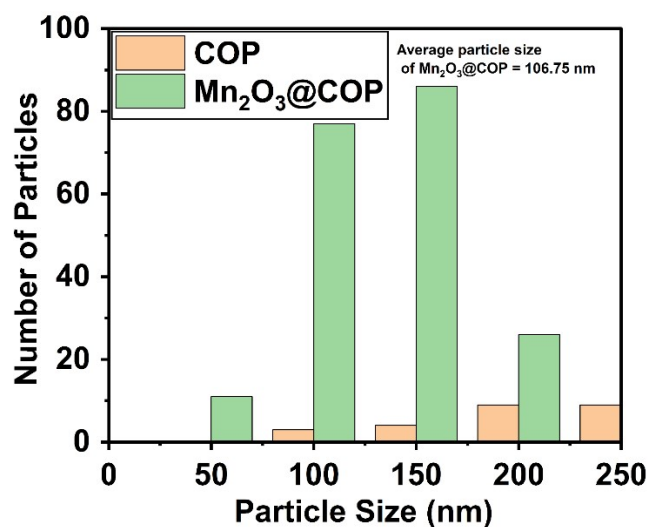

Figure. S1\* A particle size distribution histogram determined from the SEM images.

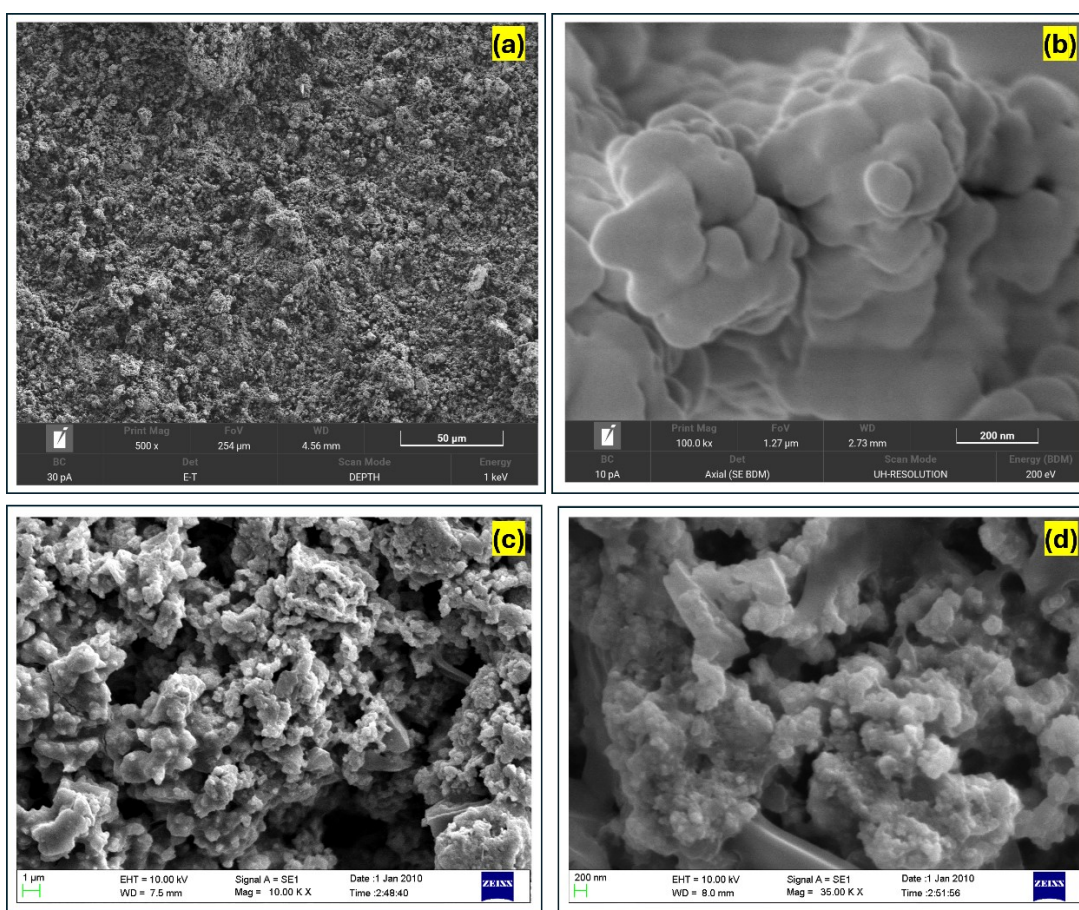

Figure. S2\* FE-SEM images of (a) COP at lower resolution, (b) COP at higher resolution, (c) Mn<sub>2</sub>O<sub>3</sub>@COP at lower resolution, (d) Mn<sub>2</sub>O<sub>3</sub>@COP at higher resolution

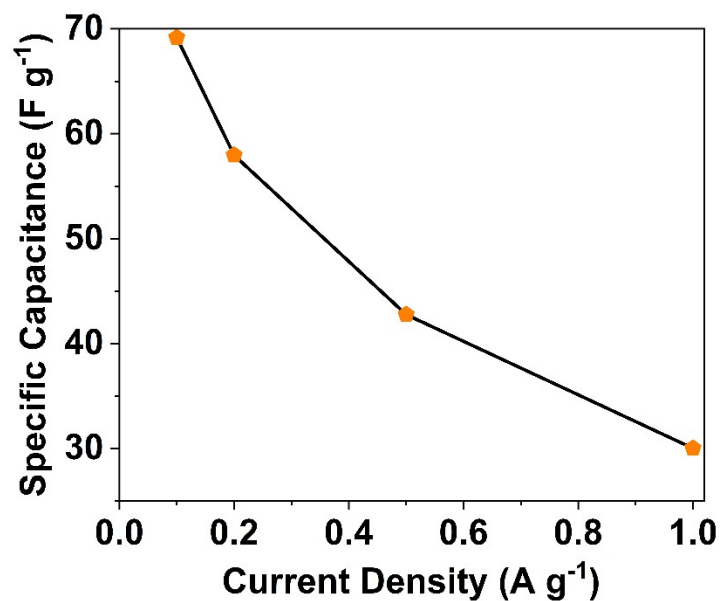

Figure. S3\* Variation of specific capacitance with respect to current density of  $\text{Mn}_2\text{O}_3@\text{COP}$  electrode in 3 electrode system with 1M  $\text{H}_2\text{SO}_4$  electrolyte

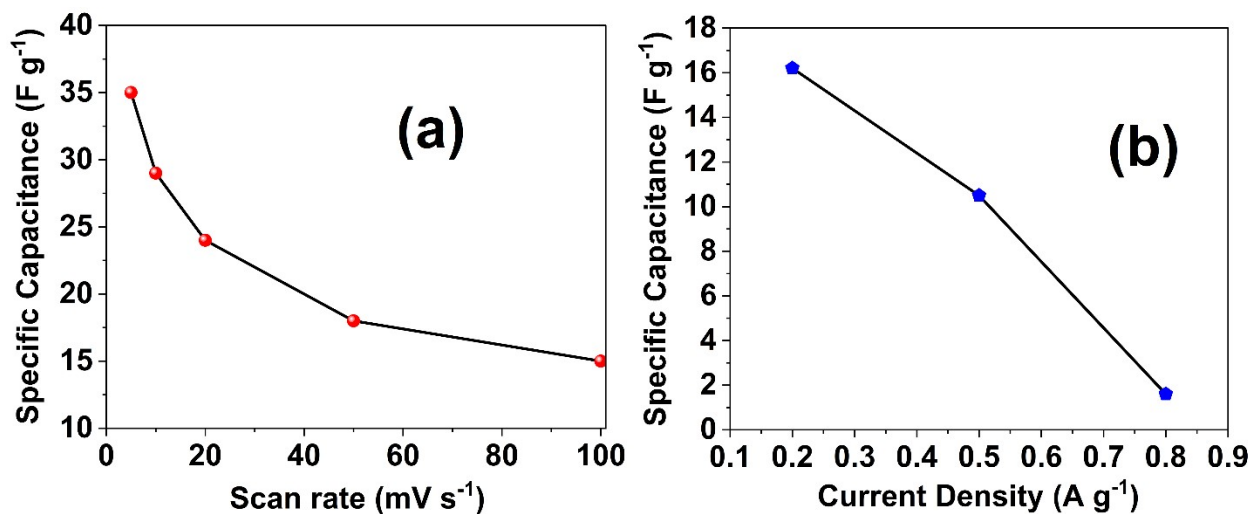

Figure. S4\* (a) specific capacitance at various scan rates, (b) specific capacitance at various current densities.
